# Supplementary material for: The demographics of assisted reproductive technology births in a Nordic country
Source: PubMed Central journal article supplement — Hum Reprod. 2020 May 28;35(6):1441–50. doi: 10.1093/humrep/deaa055 (PMC7316497; doi:10.1093/humrep/deaa055), 2020-05-28
Supplement: suppl_t1_deaa055.pdf [file suppl_t1_deaa055.pdf]

**Supplementary Table SI Linear model for probability of ART amongst births 2000–14.**

**All birth orders**

|                         |                            |                               |                               |
|-------------------------|----------------------------|-------------------------------|-------------------------------|
| Intercept               | 0.01212 (0.01129, 0.01294) | 0.02170 (0.02062, 0.02279)    | 0.00718 (0.00550, 0.00887)    |
| Income                  |                            |                               |                               |
| First quartile          | 0                          | 0                             | 0                             |
| Second                  | 0.01313 (0.01198, 0.01427) | 0.00841 (0.00725, 0.00957)    | 0.00798 (0.00681, 0.00915)    |
| Third                   | 0.02483 (0.02369, 0.02597) | 0.01576 (0.01457, 0.01695)    | 0.01597 (0.01466, 0.01707)    |
| Fourth                  | 0.04183 (0.04068, 0.04297) | 0.02662 (0.02539, 0.02785)    | 0.02774 (0.02647, 0.02902)    |
| Age                     |                            |                               |                               |
| 20–24                   |                            | −0.02349 (−0.02490, −0.02209) | −0.01983 (−0.02131, −0.01835) |
| 25–29                   |                            | −0.01508 (−0.01608, −0.01408) | −0.01419 (−0.01520, −0.01318) |
| 30–34                   |                            | 0                             | 0                             |
| 35–39                   |                            | 0.02475 (0.02359, 0.02590)    | 0.02480 (0.02364, 0.02595)    |
| 40–44                   |                            | 0.02538 (0.02313, 0.02763)    | 0.02625 (0.02399, 0.02850)    |
| 45+                     |                            | −0.00768 (−0.01731, 0.00194)  | −0.00745 (−0.01706, 0.00216)  |
| Education               |                            |                               |                               |
| Primary/lower secondary |                            |                               | 0                             |
| Upper secondary         |                            |                               | 0.00287 (0.00171, 0.00402)    |
| Lower tertiary          |                            |                               | −0.00091 (−0.00207, 0.00026)  |
| Upper tertiary          |                            |                               | −0.00456 (−0.00619, −0.00293) |
| Place of residence      |                            |                               |                               |
| Oslo                    |                            |                               | 0                             |
| East, other city        |                            |                               | 0.00674 (0.00517, 0.00831)    |
| East not city           |                            |                               | 0.00423 (0.00287, 0.00558)    |
| South, city             |                            |                               | 0.01198 (0.01031, 0.01366)    |
| South, not city         |                            |                               | 0.01621 (0.01430, 0.01811)    |
| West, city              |                            |                               | 0.00732 (0.00557, 0.00908)    |
| West, not city          |                            |                               | 0.00724 (0.00558, 0.00890)    |
| Central, city           |                            |                               | 0.01474 (0.01262, 0.01686)    |
| Central, not city       |                            |                               | 0.01300 (0.01079, 0.01522)    |
| North, city             |                            |                               | 0.00155 (−0.00073, 0.00384)   |
| North, not city         |                            |                               | 0.00140 (−0.00062, 0.00342)   |
| Marital status          |                            |                               |                               |
| Not married             |                            |                               | 0                             |
| Married                 |                            |                               | 0.01599 (0.01515, 0.01682)    |

Conditioned on knowing the income of the parents and the mother's education and marital status, the mother being 20+ and living in Norway at the beginning of the year of birth (and the child being reckoned as born in Norway).  $N = 755\,797$ .
