# Supplementary material for: The demographics of assisted reproductive technology births in a Nordic country
Source: PubMed Central journal article supplement — Hum Reprod. 2020 May 28;35(6):1441–50. doi: 10.1093/humrep/deaa055 (PMC7316497; doi:10.1093/humrep/deaa055), 2020-05-28
Supplement: suppl_t2_deaa055.pdf [file suppl_t2_deaa055.pdf]

**Supplementary Table SII** Linear model for probability of ART amongst first births 2000–14.

| <b>Birth order 1</b>    |                            |                               |                               |
|-------------------------|----------------------------|-------------------------------|-------------------------------|
| Intercept               | 0.01626 (0.01473, 0.01780) | 0.06262 (0.06032, 0.06493)    | 0.03276 (0.02939, 0.03613)    |
| Income                  |                            |                               |                               |
| First quartile          | 0                          | 0                             | 0                             |
| Second                  | 0.02606 (0.02382, 0.02831) | 0.01295 (0.01068, 0.01521)    | 0.01158 (0.00933, 0.01383)    |
| Third                   | 0.04569 (0.04349, 0.04790) | 0.01849 (0.01616, 0.02082)    | 0.01805 (0.01573, 0.02037)    |
| Fourth                  | 0.07071 (0.06854, 0.07288) | 0.02157 (0.01913, 0.02401)    | 0.02566 (0.02320, 0.02812)    |
| Age                     |                            |                               |                               |
| 20–24                   |                            | –0.06473 (–0.06720, –0.06226) | –0.06824 (–0.07092, –0.06555) |
| 25–29                   |                            | –0.04780 (–0.04977, –0.04583) | –0.05127 (–0.05326, –0.04928) |
| 30–34                   |                            | 0                             | 0                             |
| 35–39                   |                            | 0.08258 (0.07965, 0.08551)    | 0.08431 (0.08141, 0.08721)    |
| 40–44                   |                            | 0.08184 (0.07557, 0.08813)    | 0.08435 (0.07814, 0.09057)    |
| 45+                     |                            | –0.01577 (–0.04127, 0.00973)  | –0.02238 (–0.04761, 0.00285)  |
| Education               |                            |                               |                               |
| Primary/lower secondary |                            |                               | 0                             |
| Upper secondary         |                            |                               | –0.00691 (–0.00924, –0.00459) |
| Lower tertiary          |                            |                               | –0.01930 (–0.02173, –0.01687) |
| Upper tertiary          |                            |                               | –0.03382 (–0.03705, –0.03058) |
| Place of residence      |                            |                               |                               |
| Oslo                    |                            |                               | 0                             |
| East, other city        |                            |                               | 0.02845 (0.02557, 0.03134)    |
| East not city           |                            |                               | 0.02586 (0.02334, 0.02837)    |
| South, city             |                            |                               | 0.03340 (0.03031, 0.03649)    |
| South, not city         |                            |                               | 0.04970 (0.04589, 0.05351)    |
| West, city              |                            |                               | 0.02865 (0.02546, 0.03185)    |
| West, not city          |                            |                               | 0.04296 (0.03966, 0.04626)    |
| Central, city           |                            |                               | 0.03755 (0.03370, 0.04140)    |
| Central, not city       |                            |                               | 0.04858 (0.04415, 0.05302)    |
| North, city             |                            |                               | 0.02262 (0.01833, 0.02690)    |
| North, not city         |                            |                               | 0.03347 (0.02947, 0.03748)    |
| Marital status          |                            |                               |                               |
| Not married             |                            |                               | 0                             |
| Married                 |                            |                               | 0.06320 (0.06144, 0.06496)    |

Conditioned on knowing the income of the parents and the mother's education and marital status, the mother being 20+ and living in Norway at the beginning of the year of birth (and the child being reckoned as born in Norway).  $N = 303\,331$ .
