# Supplementary material for: The demographics of assisted reproductive technology births in a Nordic country
Source: PubMed Central journal article supplement — Hum Reprod. 2020 May 28;35(6):1441–50. doi: 10.1093/humrep/deaa055 (PMC7316497; doi:10.1093/humrep/deaa055), 2020-05-28
Supplement: suppl_t3_deaa055.pdf [file suppl_t3_deaa055.pdf]

**Supplementary Table SIII** Linear model for probability of ART amongst second or higher order births 2000–14.

**Birth order 2+**

|                         |                            |                               |                               |
|-------------------------|----------------------------|-------------------------------|-------------------------------|
| Intercept               | 0.00873 (0.00787, 0.00960) | 0.00967 (0.00862, 0.01072)    | −0.00199 (−0.00371, −0.00027) |
| Income                  |                            |                               |                               |
| First quartile          | 0                          | 0                             | 0                             |
| Second                  | 0.00674 (0.00557, 0.00790) | 0.00500 (0.00383, 0.00617)    | 0.00460 (0.00343, 0.00578)    |
| Third                   | 0.01253 (0.01136, 0.01369) | 0.00793 (0.00673, 0.00912)    | 0.00790 (0.00668, 0.00913)    |
| Fourth                  | 0.02220 (0.02102, 0.02338) | 0.01338 (0.01214, 0.01462)    | 0.01418 (0.01289, 0.01548)    |
| Age                     |                            |                               |                               |
| 20–24                   |                            | −0.01189 (−0.01376, −0.01001) | −0.01084 (−0.01277, −0.00890) |
| 25–29                   |                            | −0.00813 (−0.00916, −0.00709) | −0.00843 (−0.00948, −0.00738) |
| 30–34                   |                            | 0                             | 0                             |
| 35–39                   |                            | 0.01939 (0.01830, 0.02039)    | 0.01994 (0.01891, 0.02099)    |
| 40–44                   |                            | 0.02321 (0.02124, 0.02518)    | 0.02447 (0.02250, 0.02644)    |
| 45+                     |                            | 0.00324 (−0.00524, 0.01173)   | 0.00435 (−0.00413, 0.01282)   |
| Education               |                            |                               |                               |
| Primary/lower secondary |                            |                               | 0                             |
| Upper secondary         |                            |                               | 0.00223 (0.00109, 0.00338)    |
| Lower tertiary          |                            |                               | −0.00130 (−0.00245, −0.00158) |
| Upper tertiary          |                            |                               | −0.00452 (−0.00617, −0.00287) |
| Place of residence      |                            |                               |                               |
| Oslo                    |                            |                               | 0                             |
| East, other city        |                            |                               | 0.00546 (0.00380, 0.00713)    |
| East not city           |                            |                               | 0.00497 (0.00352, 0.00641)    |
| South, city             |                            |                               | 0.01115 (0.00940, 0.01291)    |
| South, not city         |                            |                               | 0.01580 (0.01388, 0.01772)    |
| West, city              |                            |                               | 0.00625 (0.00439, 0.00811)    |
| West, not city          |                            |                               | 0.00837 (0.00668, 0.01006)    |
| Central, city           |                            |                               | 0.01407 (0.01183, 0.01631)    |
| Central, not city       |                            |                               | 0.01299 (0.01073, 0.01516)    |
| North, city             |                            |                               | 0.00324 (0.00088, 0.00561)    |
| North, not city         |                            |                               | 0.00250 (0.00046, 0.00454)    |
| Marital status          |                            |                               |                               |
| Not married             |                            |                               | 0                             |
| Married                 |                            |                               | 0.00907 (0.00824, 0.00990)    |

Conditioned on knowing the income of the parents and the mother's education and marital status, the mother being 20+ and living in Norway at the beginning of the year of birth (and the child being reckoned as born in Norway).  $N = 452\,466$ .
